# Supplementary material
Source: publisher figshare collection journal article supplement (https://tandf.figshare.com/articles/dataset/_/17082405)

**A**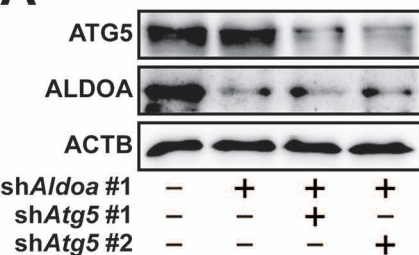**B**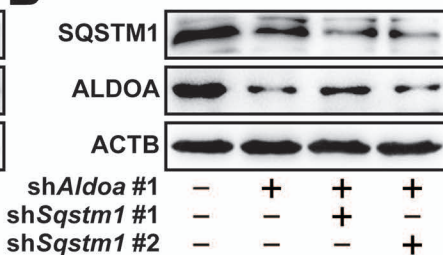**C**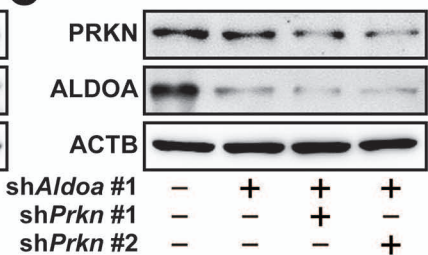**D**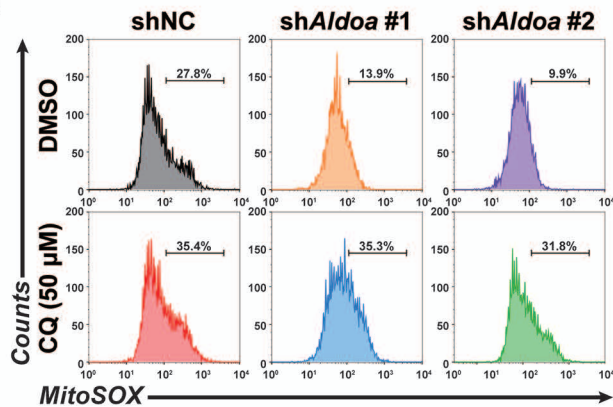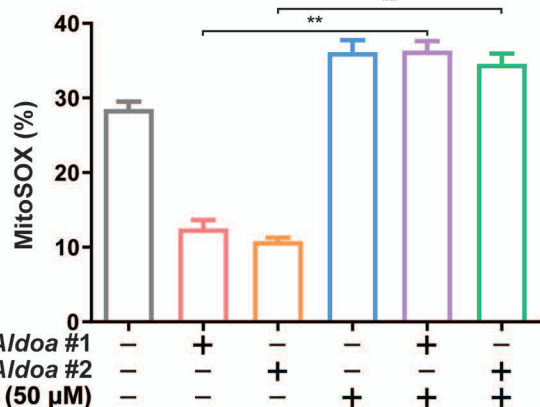**E**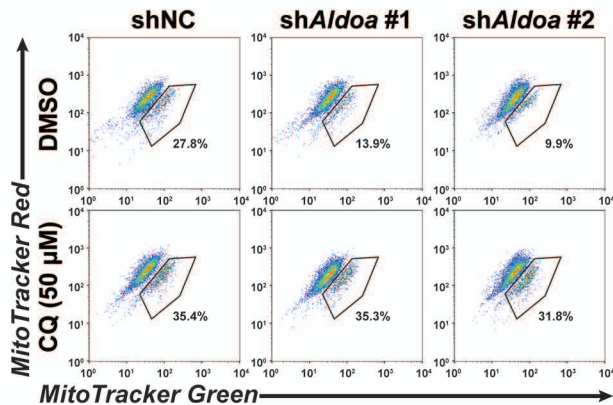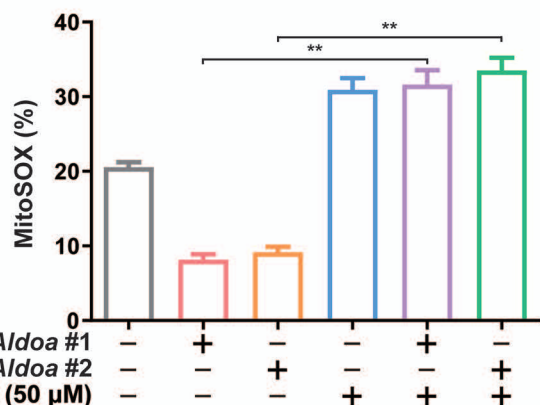**F**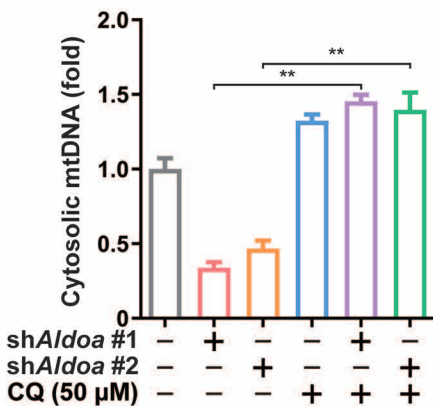**G**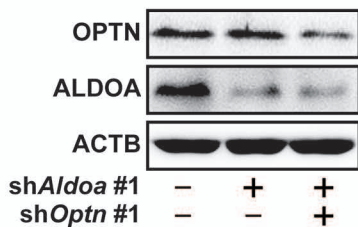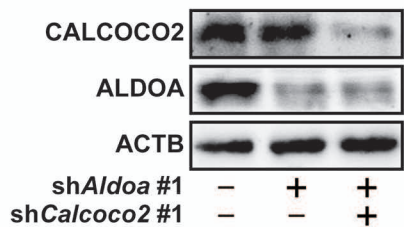

Supplement: Supplementary file 1 [file 1]

**A**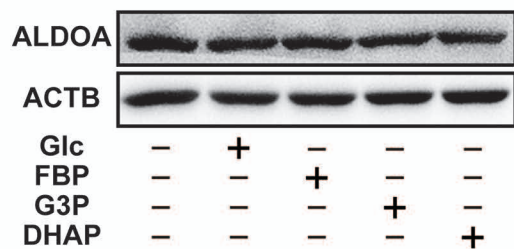**B**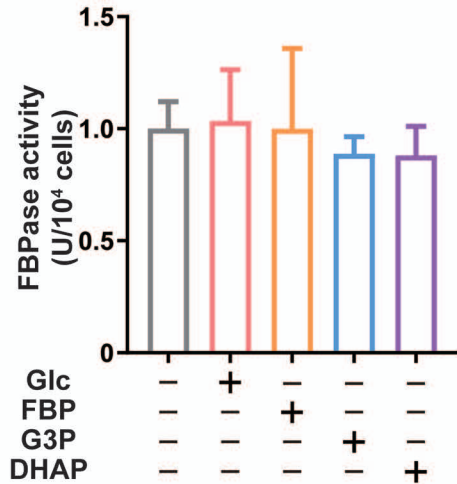**C**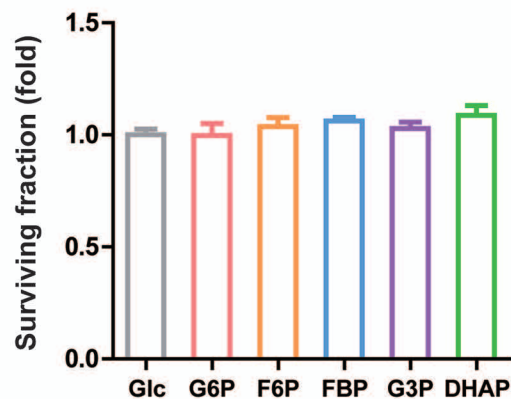**D**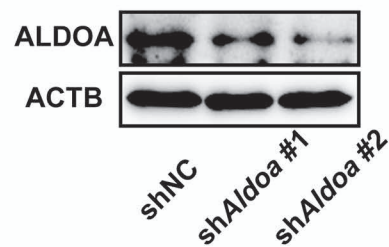**E**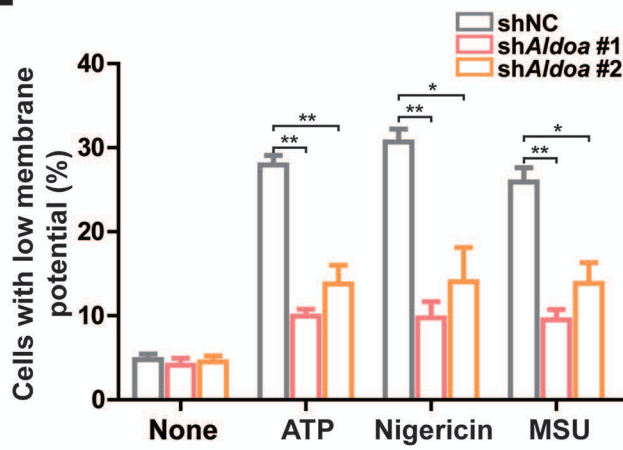**F**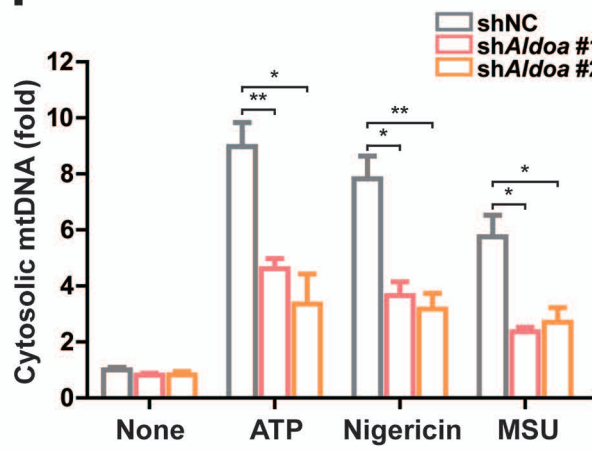

Supplement: Supplementary file 3 [file 1]

**A**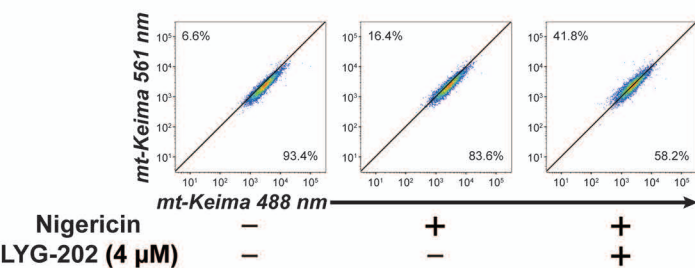**C**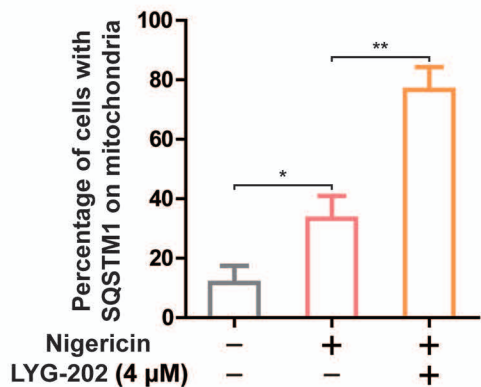**D**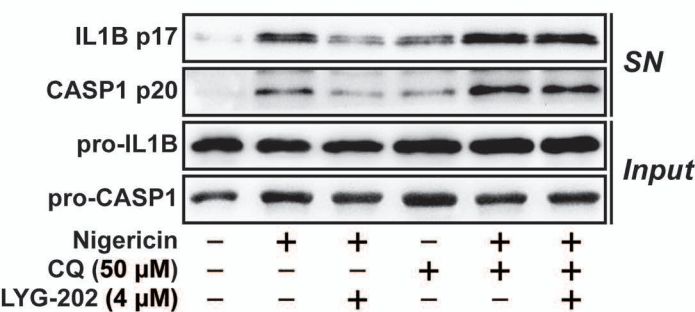**F**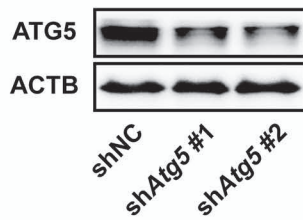**G**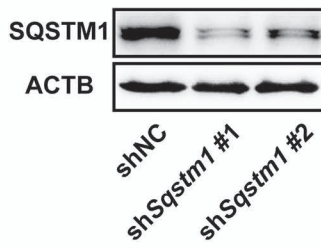**B**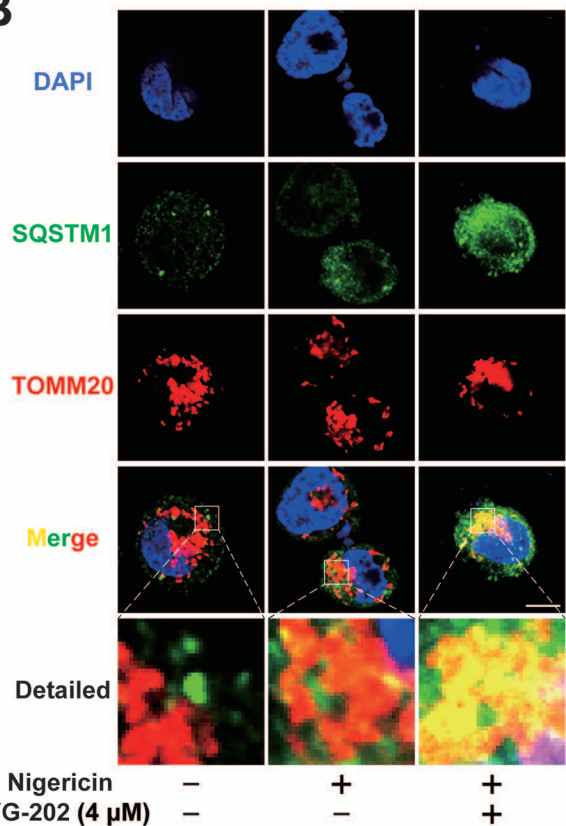**E**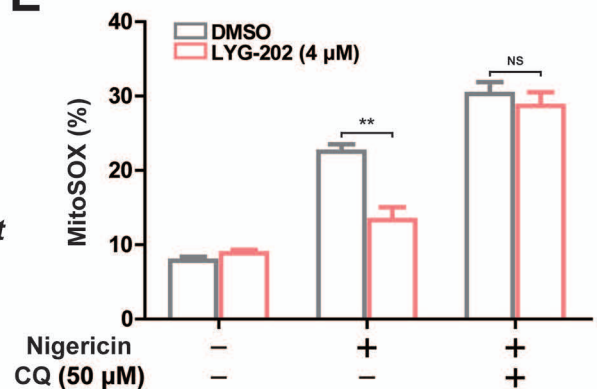**H**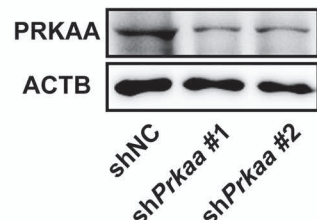

Supplement: Supplementary file 4 [file 1]

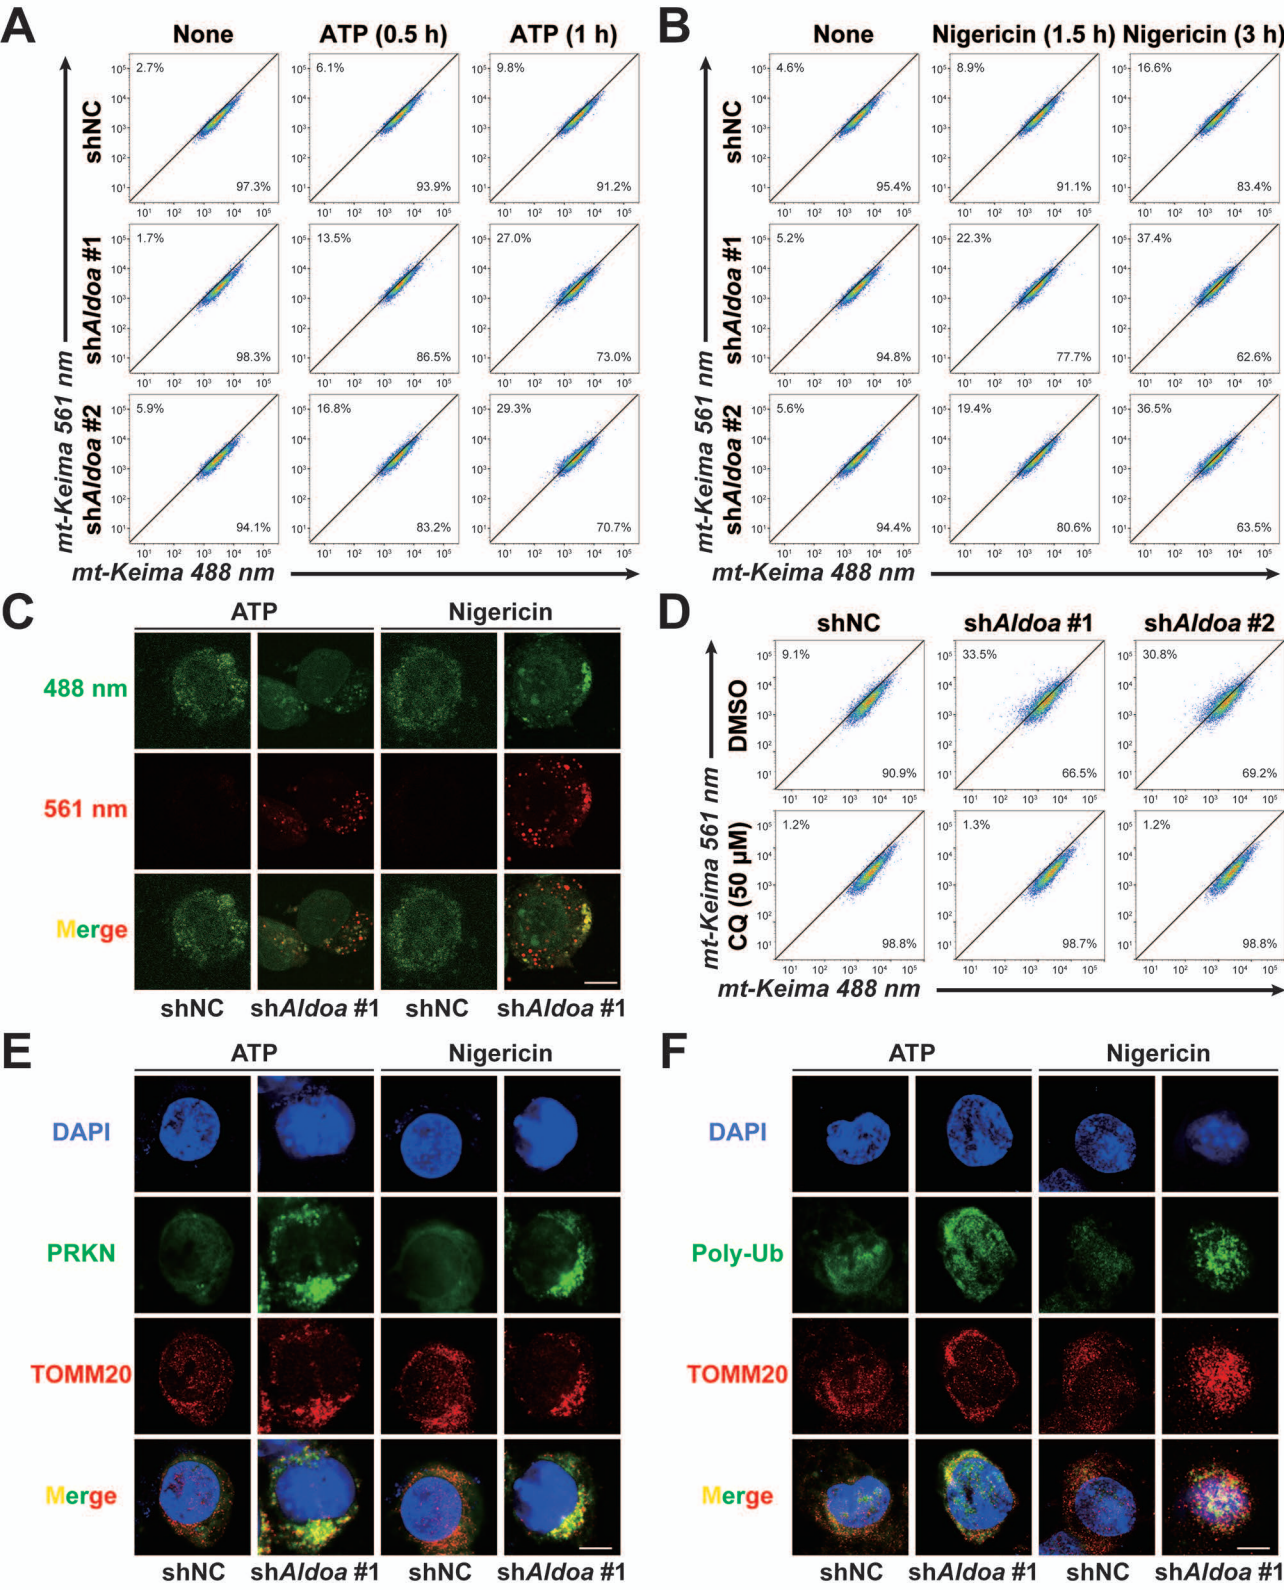

Supplement: Supplementary file 5 [file 1]

**A**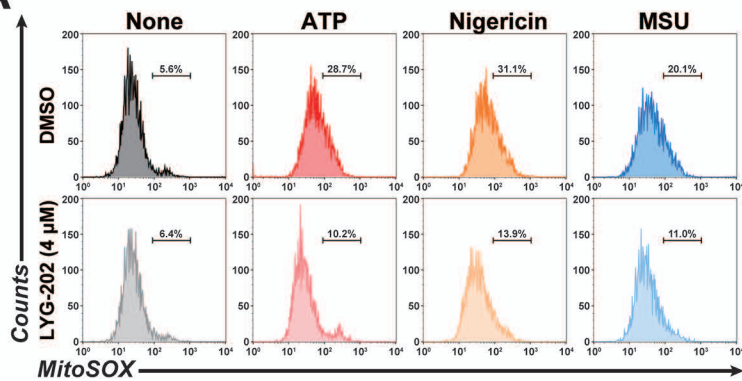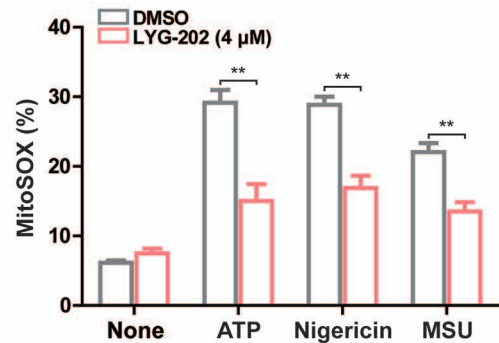**B**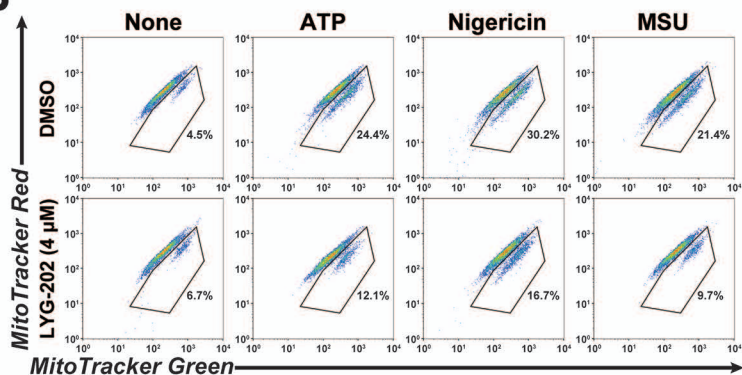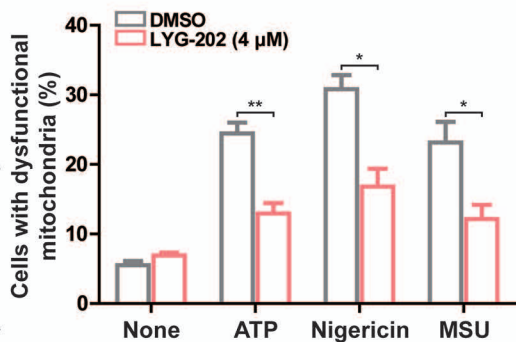**C**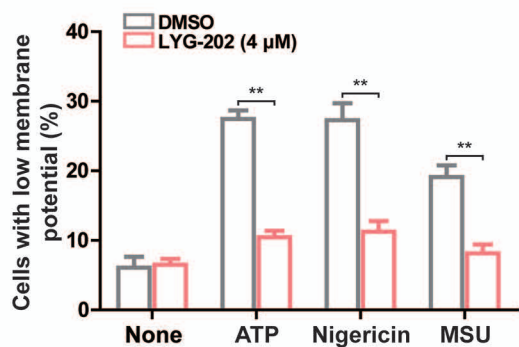**D**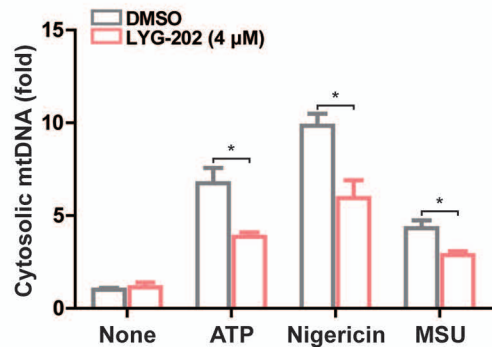**E**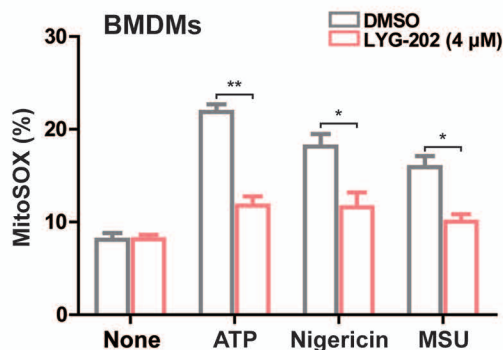**F**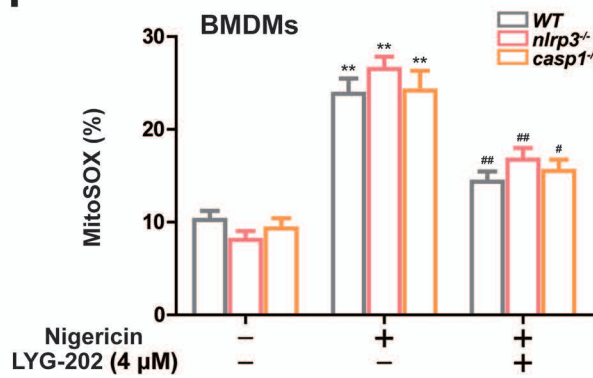

Supplement: Supplementary file 6 [file 1]

**A**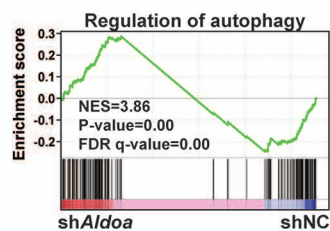**D**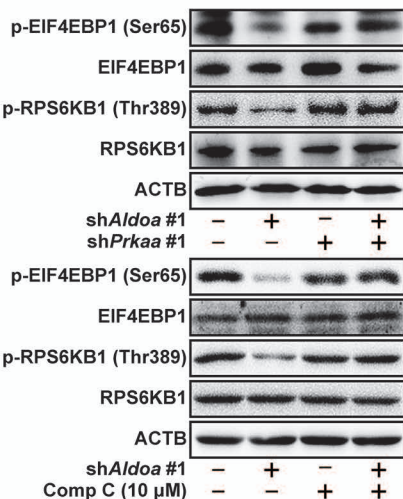**F**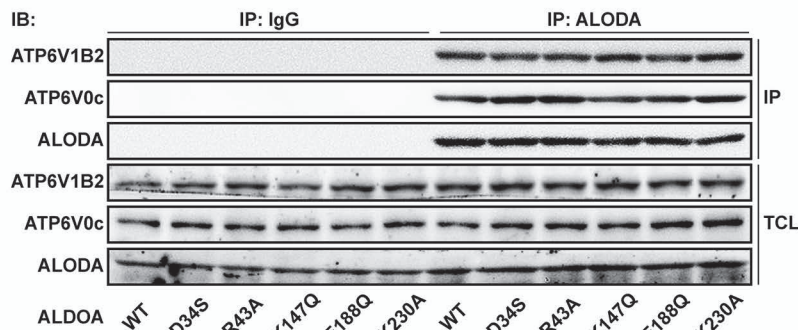**B**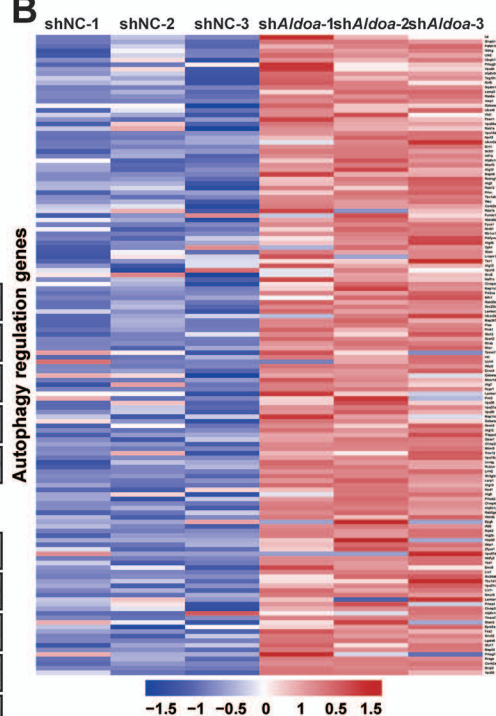**C**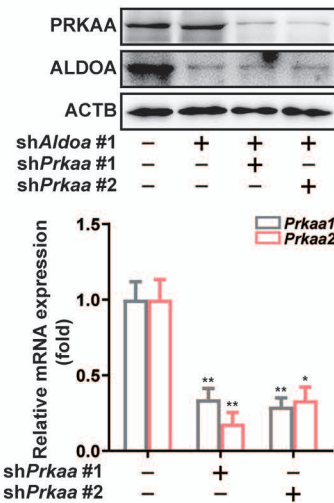**E**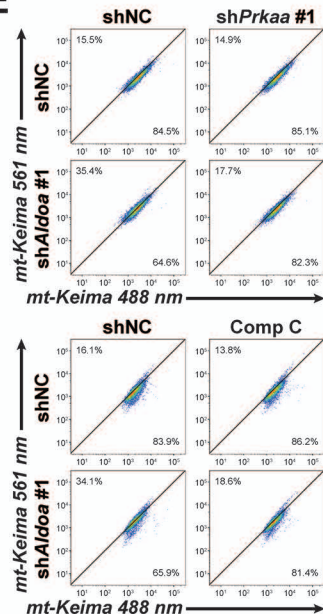

Supplement: Supplementary file 7 [file 1]

**A**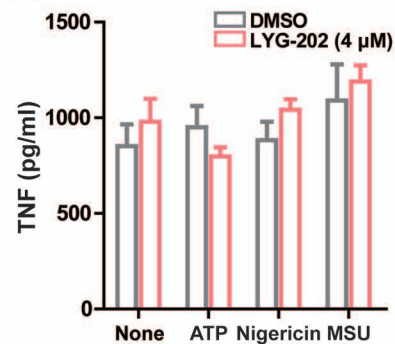**B**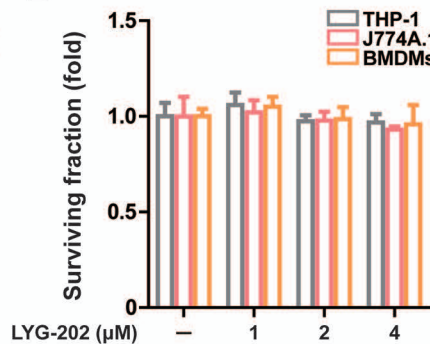**C**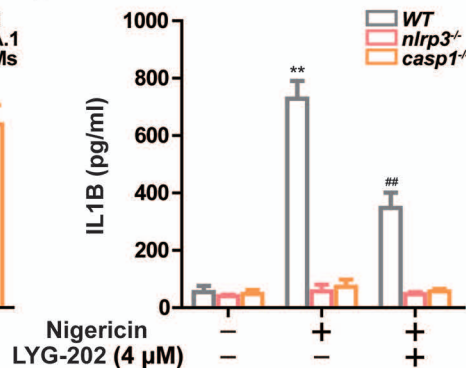**D**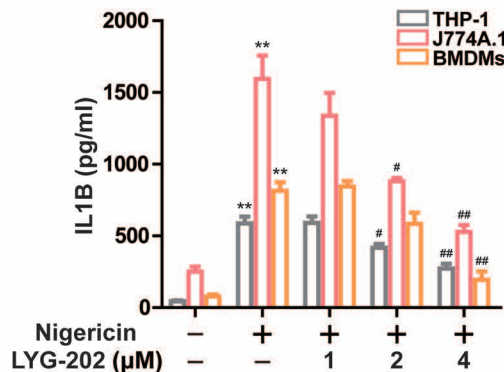**E**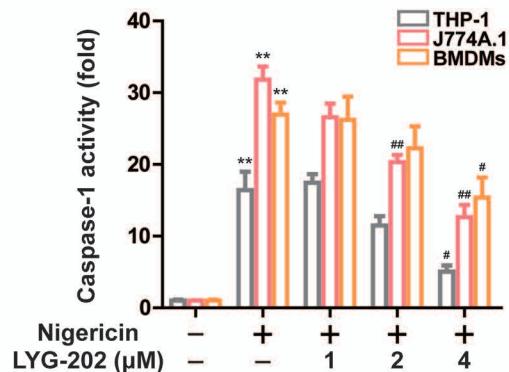**F**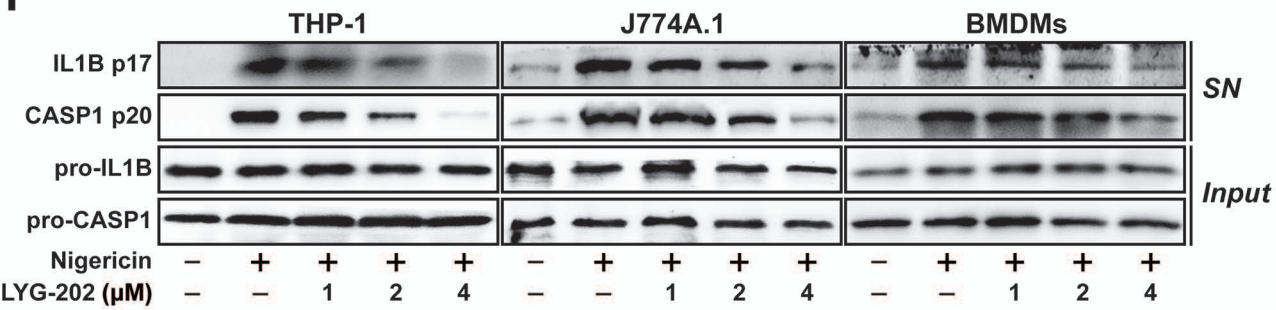

Supplement: Supplementary file 8 [file 1]
